# Supplementary material
Source: PubMed Central journal article supplement (PMC6034980)
Supplement: NIHMS954183-supplement-Supplemental.pdf [file NIHMS954183-supplement-Supplemental.pdf]

1 **REFERENCES:**

2

3 [1] Berbari, N. F.; O'Connor, A. K.; Haycraft, C. J.; Yoder, B. K. The Primary Cilium as a  
4 Complex Signaling Center. *Curr. Biol.* **2009**, *19* (13), R526-35.

5 [2] Goetz, S. C.; Anderson, K. V. The Primary Cilium: A Signalling Centre during Vertebrate  
6 Development. *Nat. Rev. Genet.* **2010**, *11* (5), 331–344.

7 [3] Takeda, S.; Narita, K. Structure and Function of Vertebrate Cilia, towards a New  
8 Taxonomy. *Differentiation* **2012**, *83* (2), S4–S11.

9 [4] Ware, S. M.; Aygun, M. G.-; Hildebrandt, F. Spectrum of Clinical Diseases Caused By  
10 Disorders of Primary Cilia. *Proc. Am. Thorac. Soc.* **2011**, *8* (5), 444–450.

11 [5] Reiter, J. F.; Leroux, M. R. Genes and Molecular Pathways Underpinning Ciliopathies.  
12 *Nat. Rev. Mol. Cell Biol.* **2017**, *18* (9), 533–547.

13 [6] Menco, B. P.; Farbman, A. I. Genesis of Cilia and Microvilli of Rat Nasal Epithelia during  
14 Pre-Natal Development. I. Olfactory Epithelium, Qualitative Studies. *J. Cell Sci.* **1985**,  
15 *78*, 283–310.

16 [7] Menco, B. P.; Farbman, A. I. Genesis of Cilia and Microvilli of Rat Nasal Epithelia during  
17 Pre-Natal Development. II. Olfactory Epithelium, A Morphometric Analysis. *J. Cell Sci.*  
18 **1985**, *78*, 311–336.

19 [8] Joiner, a. M.; Green, W. W.; McIntyre, J. C.; Allen, B. L.; Schwob, J. E.; Martens, J. R.  
20 Primary Cilia on Horizontal Basal Cells Regulate Regeneration of the Olfactory  
21 Epithelium. *J. Neurosci.* **2015**, *35* (40), 13761–13772.

22 [9] Williams, C. L.; McIntyre, J. C.; Norris, S. R.; Jenkins, P. M.; Zhang, L.; Pei, Q.; Verhey,  
23 K.; Martens, J. R. Direct Evidence for BBSome-Associated Intraflagellar Transport

- 1 Reveals Distinct Properties of Native Mammalian Cilia. *Nat. Commun.* **2014**, *5*, 5813.
- 2 [10] Ulloa-Aguirre, A.; Conn, P. M. Pharmacoperones as a New Therapeutic Approach: In  
3 Vitro Identification and In Vivo Validation of Bioactive Molecules. *Curr. Drug Targets*  
4 **2016**, *17* (13), 1471–1481.
- 5 [11] Rutkowska, A.; Dev, K. K.; Sailer, A. W. The Role of the Oxysterol/EBI2 Pathway in the  
6 Immune and Central Nervous Systems. *Curr. Drug Targets* **2016**, *17* (16), 1851–1860.
- 7 [12] Liapakis, G.; Matsoukas, M.-T.; Karageorgos, V.; Venihaki, M.; Mavromoustakos, T.  
8 Family B G Protein-Coupled Receptors and Their Ligands: From Structure to Function.  
9 *Curr. Med. Chem.* **2017**, *24* (31), 3323–3355.
- 10 [13] Hauser, A. S.; Attwood, M. M.; Rask-Andersen, M.; Schiöth, H. B.; Gloriam, D. E. Trends  
11 in GPCR Drug Discovery: New Agents, Targets and Indications. *Nat. Rev. Drug Discov.*  
12 **2017**, *16* (12), 829–842.
- 13 [14] Temmel, A. F. P.; Quint, C.; Schickinger-Fischer, B.; Klimek, L.; Stoller, E.; Hummel, T.  
14 Characteristics of Olfactory Disorders in Relation to Major Causes of Olfactory Loss.  
15 *Arch. Otolaryngol. Head. Neck Surg.* **2002**, *128* (6), 635–641.
- 16 [15] Gopinath, B.; Anstey, K. J.; Sue, C. M.; Kifley, A.; Mitchell, P. Olfactory Impairment in  
17 Older Adults Is Associated with Depressive Symptoms and Poorer Quality of Life  
18 Scores. *Am. J. Geriatr. Psychiatry* **2011**, *19* (9), 830–834.
- 19 [16] Philpott, C. M.; Boak, D. The Impact of Olfactory Disorders in the United Kingdom.  
20 *Chem. Senses* **2014**, *39* (8), 711–718.
- 21 [17] Holbrook, E. H.; Leopold, D. a. An Updated Review of Clinical Olfaction. *Curr. Opin.*  
22 *Otolaryngol. Head Neck Surg.* **2006**, *14* (1), 23–28.
- 23 [18] Kulaga, H. M.; Leitch, C. C.; Eichers, E. R.; Badano, J. L.; Lesemann, A.; Hoskins, B. E.;

- 1 Lupski, J. R.; Beales, P. L.; Reed, R. R.; Katsanis, N. Loss of BBS Proteins Causes  
2 Anosmia in Humans and Defects in Olfactory Cilia Structure and Function in the Mouse.  
3 *Nat. Genet.* **2004**, *36* (9), 994–998.
- 4 [19] McEwen, D. P.; Koenekoop, R. K.; Khanna, H.; Jenkins, P. M.; Lopez, I.; Swaroop, A.;  
5 Martens, J. R. Hypomorphic CEP290 / NPHP6 Mutations Result in Anosmia Caused by  
6 the Selective Loss of G Proteins in Cilia of Olfactory Sensory Neurons. **2007**, *104* (40),  
7 15917–15922.
- 8 [20] Tadenev, A. L. D.; Kulaga, H. M.; May-Simera, H. L.; Kelley, M. W.; Katsanis, N.; Reed,  
9 R. R. Loss of Bardet-Biedl Syndrome Protein-8 (BBS8) Perturbs Olfactory Function,  
10 Protein Localization, and Axon Targeting. *Proc. Natl. Acad. Sci. U. S. A.* **2011**, *108* (25),  
11 10320–10325.
- 12 [21] McIntyre, J. C.; Davis, E. E.; Joiner, A.; Williams, C. L.; Tsai, I.; Jenkins, P. M.; McEwen,  
13 D. P.; Zhang, L.; Escobado, J.; Thomas, S.; Szymanska, K.; Johnson, C. A.; Beales, P.  
14 L.; Green, E. D.; Mullikin, J. C.; Comparative, N.; Program, S.; Sabo, A.; Muzny, D. M.;  
15 Gibbs, R. A.; Attié-bitach, T.; Yoder, B. K.; Reed, R. R.; Katsanis, N.; Martens, J. R.  
16 Gene Therapy Rescues Cilia Defects and Restores Olfactory Function in a Mammalian  
17 Ciliopathy Model. **2012**, *18* (9).
- 18 [22] Williams, C. L.; Uyttingco, C. R.; Green, W. W.; McIntyre, J. C.; Ukhanov, K.;  
19 Zimmerman, A. D.; Shively, D. T.; Zhang, L.; Nishimura, D. Y.; Sheffield, V. C.; Martens,  
20 J. R. Gene Therapeutic Reversal of Peripheral Olfactory Impairment in Bardet-Biedl  
21 Syndrome. *Mol. Ther.* **2017**, *25* (4), 904–916.
- 22 [23] Abd-El-Barr, M. M.; Sykoudis, K.; Andrabi, S.; Eichers, E. R.; Pennesi, M. E.; Tan, P. L.;  
23 Wilson, J. H.; Katsanis, N.; Lupski, J. R.; Wu, S. M. Impaired Photoreceptor Protein

1 Transport and Synaptic Transmission in a Mouse Model of Bardet-Biedl Syndrome.  
2 *Vision Res.* **2007**, *47* (27), 3394–3407.

3 [24] Fath, M. A.; Mullins, R. F.; Searby, C.; Nishimura, D. Y.; Wei, J.; Rahmouni, K.; Davis, R.  
4 E.; Tayeh, M. K.; Andrews, M.; Yang, B.; Sigmund, C. D.; Stone, E. M.; Sheffield, V. C.  
5 Mkks-Null Mice Have a Phenotype Resembling Bardet - Biedl Syndrome. *Hum. Mol.*  
6 *Genet.* **2005**, *14* (9), 1109–1118.

7 [25] Nishimura, D. Y.; Fath, M.; Mullins, R. F.; Searby, C.; Andrews, M.; Davis, R.; Andorf, J.  
8 L.; Myktyyn, K.; Swiderski, R. E.; Yang, B.; Carmi, R.; Stone, E. M.; Sheffield, V. C.  
9 Bbs2-Null Mice Have Neurosensory Deficits, a Defect in Social Dominance, and  
10 Retinopathy Associated with Mislocalization of Rhodopsin. *Proc Natl Acad Sci U S A*  
11 **2004**, *101* (47), 16588–16593.

12 [26] Myktyyn, K.; Mullins, R. F.; Andrews, M.; Chiang, A. P.; Swiderski, R. E.; Yang, B.;  
13 Braun, T.; Casavant, T.; Stone, E. M.; Sheffield, V. C. Bardet-Biedl Syndrome Type 4  
14 (BBS4)-Null Mice Implicate Bbs4 in Flagella Formation but Not Global Cilia Assembly.  
15 *Proc. Natl. Acad. Sci. U. S. A.* **2004**, *101* (23), 8664–8669.

16 [27] Davis, R. E.; Swiderski, R. E.; Rahmouni, K.; Nishimura, D. Y.; Mullins, R. F.;  
17 Agassandian, K.; Philp, A. R.; Searby, C. C.; Andrews, M. P.; Thompson, S.; Berry, C.  
18 J.; Thedens, D. R.; Yang, B.; Weiss, R. M.; Cassell, M. D.; Stone, E. M.; Sheffield, V. C.  
19 A Knockin Mouse Model of the Bardet Biedl Syndrome 1 M390R Mutation Has Cilia  
20 Defects, Ventriculomegaly, Retinopathy, and Obesity. *Proc. Natl. Acad. Sci.* **2007**, *104*  
21 (49), 19422–19427.

22 [28] Pretorius, P. R.; Baye, L. M.; Nishimura, D. Y.; Searby, C. C.; Bugge, K.; Yang, B.;  
23 Mullins, R. F.; Stone, E. M.; Sheffield, V. C.; Slusarski, D. C. Identification and Functional

1 Analysis of the Vision-Specific BBS3 (ARL6) Long Isoform. *PLoS Genet.* **2010**, 6 (3).

2 [29] Mockel, A.; Obringer, C.; Hakvoort, T. B. M.; Seeliger, M.; Lamers, W. H.; Stoetzel, C.;  
3 Dollfus, H.; Marion, V. Pharmacological Modulation of the Retinal Unfolded Protein  
4 Response in Bardet-Biedl Syndrome Reduces Apoptosis and Preserves Light Detection  
5 Ability. *J. Biol. Chem.* **2012**, 287 (44), 37483–37494.

6 [30] Shillingford, J. M.; Murcia, N. S.; Larson, C. H.; Low, S. H.; Hedgepeth, R.; Brown, N.;  
7 Flask, C. A.; Novick, A. C.; Goldfarb, D. A.; Kramer-Zucker, A.; Walz, G.; Piontek, K. B.;  
8 Germino, G. G.; Weimbs, T. The mTOR Pathway Is Regulated by Polycystin-1, and Its  
9 Inhibition Reverses Renal Cystogenesis in Polycystic Kidney Disease. *Proc. Natl. Acad.*  
10 *Sci.* **2006**, 103 (14), 5466–5471.

11 [31] Wahl, P. R.; Serra, A. L.; Le Hir, M.; Molle, K. D.; Hall, M. N.; Wüthrich, R. P. Inhibition of  
12 mTOR with Sirolimus Slows Disease Progression in Han:SPRD Rats with Autosomal  
13 Dominant Polycystic Kidney Disease (ADPKD). *Nephrol. Dial. Transplant.* **2006**, 21 (3),  
14 598–604.

15 [32] Masyuk, T. V.; Masyuk, A. I.; Torres, V. E.; Harris, P. C.; Lorusso, N. F. Octreotide  
16 Inhibits Hepatic Cystogenesis in a Rodent Model of Polycystic Liver Disease by  
17 Reducing Cholangiocyte Adenosine 3',5'-Cyclic Monophosphate. *Gastroenterology*  
18 **2007**, 132 (3), 1104–1116.

19 [33] Ibraghimov-Beskrovnaya, O. Molecular Pathogenesis of ADPKD and Development of  
20 Targeted Therapeutic Options. *Nephrol. Dial. Transplant.* **2007**, 22 (12), 3367–3370.

21 [34] Chang, M.-Y.; Ong, A. C. M. Mechanism-Based Therapeutics for Autosomal Dominant  
22 Polycystic Kidney Disease: Recent Progress and Future Prospects. *Nephron Clin. Pract.*  
23 **2012**, 120 (1), c25–c35.

- 1 [35] Torres, V. E.; Chapman, A. B.; Devuyst, O.; Gansevoort, R. T.; Grantham, J. J.;  
2 Higashihara, E.; Perrone, R. D.; Krasa, H. B.; Ouyang, J.; Czerwiec, F. S. Tolvaptan in  
3 Patients with Autosomal Dominant Polycystic Kidney Disease. *N. Engl. J. Med.* **2012**,  
4 367 (25), 2407–2418.
- 5 [36] Skalicka, K.; Kovacs, L. Ciliotherapy—New Opportunity for Targeted Therapy in  
6 Autosomal Dominant Polycystic Kidney Disease. *J. Genet. Syndr. Gene Ther.* **2016**, 7  
7 (5), 5–8.
- 8 [37] Sharma, N.; Malarkey, E. B.; Berbari, N. F.; O'Connor, A. K.; Vanden Heuvel, G. B.;  
9 Mrug, M.; Yoder, B. K. Proximal Tubule Proliferation Is Insufficient to Induce Rapid Cyst  
10 Formation after Cilia Disruption. *J. Am. Soc. Nephrol.* **2013**, 24 (3), 456–464.
- 11 [38] Lee, S. H.; Somlo, S. Cyst Growth, Polycystins, and Primary Cilia in Autosomal  
12 Dominant Polycystic Kidney Disease. *Kidney Res. Clin. Pract.* **2014**, 33 (2), 73–78.
- 13 [39] Verghese, E.; Weidenfeld, R.; Bertram, J. F.; Ricardo, S. D.; Deane, J. A. Renal Cilia  
14 Display Length Alterations Following Tubular Injury and Are Present Early in Epithelial  
15 Repair. *Nephrol. Dial. Transplant.* **2008**, 23 (3), 834–841.
- 16 [40] Ong, A. C. M. Primary Cilia and Renal Cysts: Does Length Matter? *Nephrol. Dial.*  
17 *Transplant.* **2013**, 28 (11), 2661–2663.
- 18 [41] Saito, S.; Tampe, B.; Müller, G. A.; Zeisberg, M. Primary Cilia Modulate Balance of  
19 Canonical and Non-Canonical Wnt Signaling Responses in the Injured Kidney.  
20 *Fibrogenesis Tissue Repair* **2015**, 8 (1), 6.
- 21 [42] Yu, F.; Ran, J.; Zhou, J. Ciliopathies: Does HDAC6 Represent a New Therapeutic  
22 Target? *Trends Pharmacol. Sci.* **2016**, 37 (2), 114–119.
- 23 [43] Plotnikova, O. V.; Nikonova, A. S.; Loskutov, Y. V.; Kozyulina, P. Y.; Pugacheva, E. N.;

- 1 Golemis, E. A. Calmodulin Activation of Aurora-A Kinase (AURKA) Is Required during  
2 Ciliary Disassembly and in Mitosis. *Mol. Biol. Cell* **2012**, 23 (14), 2658–2670.
- 3 [44] Mergen, M.; Engel, C.; Müller, B.; Follo, M.; Schäfer, T.; Jung, M.; Walz, G. The  
4 Nephronophthisis Gene Product NPHP2/Inversin Interacts with Aurora A and Interferes  
5 with HDAC6-Mediated Cilia Disassembly. *Nephrol. Dial. Transplant.* **2013**, 28 (11),  
6 2744–2753.
- 7 [45] Dere, R.; Perkins, A. L.; Bawa-Khalife, T.; Jonasch, D.; Walker, C. L. Beta-Catenin Links  
8 von Hippel-Lindau to Aurora Kinase A and Loss of Primary Cilia in Renal Cell  
9 Carcinoma. *J. Am. Soc. Nephrol.* **2015**, 26 (3), 553–564.
- 10 [46] Ran, J.; Yang, Y.; Li, D.; Liu, M.; Zhou, J. Deacetylation of  $\alpha$ -Tubulin and Cortactin Is  
11 Required for HDAC6 to Trigger Ciliary Disassembly. *Sci. Rep.* **2015**, 5, 12917.
- 12 [47] Gradilone, S. A.; Radtke, B. N.; Bogert, P. S.; Huang, B. Q.; Gajdos, G. B.; LaRusso, N.  
13 F. HDAC6 Inhibition Restores Ciliary Expression and Decreases Tumor Growth. *Cancer*  
14 *Res.* **2013**, 73 (7), 2259 LP-2270.
- 15 [48] Kai, K.; Satoh, H.; Kajimura, T.; Kato, M.; Uchida, K.; Yamaguchi, R.; Tateyama, S.;  
16 Furuhashi, K. Olfactory Epithelial Lesions Induced by Various Cancer Chemotherapeutic  
17 Agents in Mice. *Toxicol. Pathol.* **2004**, 32 (6), 701–709.
- 18 [49] Loktev, A. V.; Zhang, Q.; Beck, J. S.; Searby, C. C.; Scheetz, T. E.; Bazan, J. F.;  
19 Slusarski, D. C.; Sheffield, V. C.; Jackson, P. K.; Nachury, M. V. A BBSome Subunit  
20 Links Ciliogenesis, Microtubule Stability, and Acetylation. *Dev. Cell* **2008**, 15 (6), 854–  
21 865.
- 22 [50] Nakakura, T.; Asano-Hoshino, A.; Suzuki, T.; Arisawa, K.; Tanaka, H.; Sekino, Y.;  
23 Kiuchi, Y.; Kawai, K.; Hagiwara, H. The Elongation of Primary Cilia via the Acetylation of

- 1           Alpha Tubulin by the Treatment with Lithium Chloride in Human Fibroblast KD Cells.  
2           *Med. Mol. Morphol.* **2015**, *48* (1), 44–53.
- 3 [51] Miyoshi, K.; Kasahara, K.; Miyazaki, I.; Asanuma, M. Lithium Treatment Elongates  
4           Primary Cilia in the Mouse Brain and in Cultured Cells. *Biochem. Biophys. Res.*  
5           *Commun.* **2009**, *388* (4), 757–762.
- 6 [52] Thompson, C. L.; Wiles, A.; Poole, C. A.; Knight, M. M. Lithium Chloride Modulates  
7           Chondrocyte Primary Cilia and Inhibits Hedgehog Signaling. *FASEB J.* **2016**, *30* (2),  
8           716–726.
- 9 [53] Ramezani, M.; Ebrahimian, M.; Hashemi, M. Current Strategies in the Modification of  
10           PLGA-Based Gene Delivery System. *Curr. Med. Chem.* **2017**, *24* (7), 728–739.
- 11 [54] Wang, K.; Huang, Q.; Qiu, F.; Sui, M. Non-Viral Delivery Systems for the Application in  
12           p53 Cancer Gene Therapy. *Curr. Med. Chem.* **2015**, *22* (35), 4118–4136.
- 13 [55] Bhosale, R. R.; Gangadharappa, H. V; Hani, U.; Ali M Osmani, R.; Vaghela, R.; Kulkarni,  
14           P. K.; Koganti, V. S. Current Perspectives on Novel Drug Delivery Systems and  
15           Therapies for Management of Prostate Cancer: An Inclusive Review. *Curr. Drug Targets*  
16           **2017**, *18* (11), 1233–1249.
- 17 [56] Muruve, D. a. The Innate Immune Response to Adenovirus Vectors. *Hum. Gene Ther.*  
18           **2004**, *15* (12), 1157–1166.
- 19 [57] Huang, D.; Pereboev, a V; Korokhov, N.; He, R.; Larocque, L.; Gravel, C.; Jaentschke,  
20           B.; Tocchi, M.; Casley, W. L.; Lemieux, M.; Curiel, D. T.; Chen, W.; Li, X. Significant  
21           Alterations of Biodistribution and Immune Responses in Balb/c Mice Administered with  
22           Adenovirus Targeted to CD40(+) Cells. *Gene Ther.* **2008**, *15* (4), 298–308.
- 23 [58] Sammels, E.; Devogelaere, B.; Mekahli, D.; Bultynck, G.; Missiaen, L.; Parys, J. B.; Cai,



- 1 Y.; Somlo, S.; De Smedt, H. Polycystin-2 Activation by Inositol 1,4,5-Trisphosphate-  
2 Induced Ca<sup>2+</sup> Release Requires Its Direct Association with the Inositol 1,4,5-  
3 Trisphosphate Receptor in a Signaling Microdomain. *J. Biol. Chem.* **2010**, *285* (24),  
4 18794–18805.
- 5 [59] Wei, F.; Karihaloo, a; Yu, Z.; Marlier, a; Seth, P.; Shibasaki, S.; Wang, T.; Sukhatme, V.  
6 P.; Somlo, S.; Cantley, L. G. Neutrophil Gelatinase-Associated Lipocalin Suppresses  
7 Cyst Growth by Pkd1 Null Cells in Vitro and in Vivo. *Kidney Int.* **2008**, *74* (10), 1310–  
8 1318.
- 9 [60] Park, E. Y.; Kim, B. H.; Lee, E. J.; Chang, E.; Kim, D. W.; Choi, S. Y.; Park, J. H.  
10 Targeting of Receptor for Advanced Glycation End Products Suppresses Cyst Growth in  
11 Polycystic Kidney Disease. *J. Biol. Chem.* **2014**, *289* (13), 9254–9262.
- 12 [61] Zhao, H.; Otaki, J. M.; Firestein, S. Adenovirus-Mediated Gene Transfer in Olfactory  
13 Neurons in Vivo. *J. Neurobiol.* **1996**, *30* (4), 521–530.
- 14 [62] Holtmaat, A. J. G. D.; Hermens, W. T. J. M. C.; Beate Oestreicher, A.; Hendrik Gispén,  
15 W.; Kaplitt, M. G.; Verhaagen, J. Efficient Adenoviral Vector-Directed Expression of a  
16 Foreign Gene to Neurons and Sustentacular Cells in the Mouse Olfactory  
17 Neuroepithelium. *Mol. Brain Res.* **1996**, *41* (1–2), 148–156.
- 18 [63] Touhara, K.; Sengoku, S.; Inaki, K.; Tsuboi, a; Hirono, J.; Sato, T.; Sakano, H.; Haga, T.  
19 Functional Identification and Reconstitution of an Odorant Receptor in Single Olfactory  
20 Neurons. *Proc. Natl. Acad. Sci. U. S. A.* **1999**, *96* (7), 4040–4045.
- 21 [64] Ivic, L.; Pyrski, M. M.; Margolis, J. W.; Richards, L. J.; Firestein, S.; Margolis, F. L.  
22 Adenoviral Vector-Mediated Rescue of the OMP-Null Phenotype in Vivo. *Nat. Neurosci.*  
23 **2000**, *3* (11), 1113–1120.

- 1 [65] Arimoto, Y.; Nagata, H.; Isegawa, N.; Kumahara, K.; Isoyama, K.; Konno, A.; Shirasawa,  
2 H. In Vivo Expression of Adenovirus-Mediated lacZ Gene in Murine Nasal Mucosa. *Acta*  
3 *Otolaryngol.* **2002**, *122* (6), 627–633.
- 4 [66] Ivic, L.; Zhang, C.; Zhang, X.; Yoon, S. O.; Firestein, S. Intracellular Trafficking of a  
5 Tagged and Functional Mammalian Olfactory Receptor. *J. Neurobiol.* **2002**, *50* (1), 56–  
6 68.
- 7 [67] Youngentob, S. L.; Pyrski, M. M.; Margolis, F. L. Adenoviral Vector-Mediated Rescue of  
8 the OMP-Null Behavioral Phenotype: Enhancement of Odorant Threshold Sensitivity.  
9 *Behav. Neurosci.* **2004**, *118*, 636–642.
- 10 [68] Venkatraman, G.; Behrens, M.; Pyrski, M.; Margolis, F. L. Expression of Coxsackie-  
11 Adenovirus Receptor (CAR) in the Developing Mouse Olfactory System. *J. Neurocytol.*  
12 **2005**, *34* (3–5), 295–305.
- 13 [69] Gau, P.; Rodriguez, S.; De Leonardis, C.; Chen, P.; Lin, D. M. Air-Assisted Intranasal  
14 Instillation Enhances Adenoviral Delivery to the Olfactory Epithelium and Respiratory  
15 Tract. *Gene Ther.* **2011**, *18* (5), 432–436.
- 16 [70] Lemiale, F.; Kong, W. P.; Akyurek, L. M.; Ling, X.; Huang, Y.; Chakrabarti, B. K.;  
17 Eckhaus, M.; Nabel, G. J. Enhanced Mucosal Immunoglobulin A Response of Intranasal  
18 Adenoviral Vector Human Immunodeficiency Virus Vaccine and Localization in the  
19 Central Nervous System. *J Virol* **2003**, *77* (18), 10078–10087.
- 20 [71] Damjanovic, D.; Zhang, X.; Mu, J.; Medina, M. F.; Xing, Z. Organ Distribution of  
21 Transgene Expression Following Intranasal Mucosal Delivery of Recombinant  
22 Replication-Defective Adenovirus Gene Transfer Vector. *Genet. Vaccines Ther.* **2008**, *6*,  
23 5.

- 1 [72] Doi, K.; Nibu, K.; Ishida, H.; Okado, H.; Terashima, T. Adenovirus-Mediated Gene  
2 Transfer in Olfactory Epithelium and Olfactory Bulb: A Long-Term Study. *Ann. Otol.*  
3 *Rhinol. Laryngol.* **2005**, *114* (8), 629–633.
- 4 [73] Zincarelli, C.; Soltys, S.; Rengo, G.; Rabinowitz, J. E. Analysis of AAV Serotypes 1–9  
5 Mediated Gene Expression and Tropism in Mice After Systemic Injection. *Mol. Ther.*  
6 **2008**, *16* (6), 1073–1080.
- 7 [74] Samulski, R. J.; Zhu, X.; Xiao, X.; Brook, J. D.; Housman, D. E.; Epstein, N.; Hunter, L.  
8 A. Targeted Integration of Adeno-Associated Virus (AAV) into Human Chromosome 19.  
9 *EMBO J.* **1991**, *10* (12), 3941–3950.
- 10 [75] Narfström, K.; Katz, M. L.; Ford, M.; Redmond, T. M.; Rakoczy, E.; Bragadóttir, R. In  
11 Vivo Gene Therapy in Young and Adult RPE65-/- Dogs Produces Long-Term Visual  
12 Improvement. In *Journal of Heredity*; 2003; Vol. 94, pp 31–37.
- 13 [76] Narfström, K.; Katz, M. L.; Bragadóttir, R.; Seeliger, M.; Boulanger, A.; Redmond, T. M.;  
14 Caro, L.; Lai, C. M.; Rakoczy, P. E. Functional and Structural Recovery of the Retina  
15 after Gene Therapy in the RPE65 Null Mutation Dog. *Investig. Ophthalmol. Vis. Sci.*  
16 **2003**, *44* (4), 1663–1672.
- 17 [77] Le Meur, G.; Stieger, K.; Smith, A. J.; Weber, M.; Deschamps, J. Y.; Nivard, D.; Mendes-  
18 Madeira, A.; Provost, N.; Péréon, Y.; Cherel, Y.; Ali, R. R.; Hamel, C.; Moullier, P.;  
19 Rolling, F. Restoration of Vision in RPE65-Deficient Briard Dogs Using an AAV Serotype  
20 4 Vector That Specifically Targets the Retinal Pigmented Epithelium. *Gene Ther.* **2007**,  
21 *14* (4), 292–303.
- 22 [78] Acland, G. M.; Aguirre, G. D.; Bennett, J.; Aleman, T. S.; Cideciyan, A. V.; Bennicelli, J.;  
23 Dejneka, N. S.; Pearce-Kelling, S. E.; Maguire, A. M.; Palczewski, K.; Hauswirth, W. W.;

1 Jacobson, S. G. Long-Term Restoration of Rod and Cone Vision by Single Dose rAAV-  
2 Mediated Gene Transfer to the Retina in a Canine Model of Childhood Blindness. *Mol.*  
3 *Ther.* **2005**, *12* (6), 1072–1082.

4 [79] Bainbridge, J. W. B.; Smith, A. J.; Barker, S. S.; Robbie, S.; Henderson, R.; Balaggan,  
5 K.; Viswanathan, A.; Holder, G. E.; Stockman, A.; Tyler, N.; Petersen-Jones, S.;  
6 Bhattacharya, S. S.; Thrasher, A. J.; Fitzke, F. W.; Carter, B. J.; Rubin, G. S.; Moore, A.  
7 T.; Ali, R. R. Effect of Gene Therapy on Visual Function in Leber’s Congenital  
8 Amaurosis. *N. Engl. J. Med.* **2008**, *358*, 2231–2239.

9 [80] Cideciyan, A. V.; Jacobson, S. G.; Beltran, W. A.; Sumaroka, A.; Swider, M.; Iwabe, S.;  
10 Roman, A. J.; Olivares, M. B.; Schwartz, S. B.; Komaromy, A. M.; Hauswirth, W. W.;  
11 Aguirre, G. D. Human Retinal Gene Therapy for Leber Congenital Amaurosis Shows  
12 Advancing Retinal Degeneration despite Enduring Visual Improvement. *Proc. Natl. Acad.*  
13 *Sci.* **2013**, *110* (6), E517–E525.

14 [81] Bainbridge, J. W. B.; Mehat, M. S.; Sundaram, V.; Robbie, S. J.; Barker, S. E.;  
15 Ripamonti, C.; Georgiadis, A.; Mowat, F. M.; Beattie, S. G.; Gardner, P. J.; Feathers, K.  
16 L.; Luong, V. A.; Yzer, S.; Balaggan, K.; Viswanathan, A.; de Ravel, T. J. L.; Casteels, I.;  
17 Holder, G. E.; Tyler, N.; Fitzke, F. W.; Weleber, R. G.; Nardini, M.; Moore, A. T.;  
18 Thompson, D. A.; Petersen-Jones, S. M.; Michaelides, M.; van den Born, L. I.;  
19 Stockman, A.; Smith, A. J.; Rubin, G.; Ali, R. R. Long-Term Effect of Gene Therapy on  
20 Leber’s Congenital Amaurosis. *N. Engl. J. Med.* **2015**, *372* (20), 1887–1897.

21 [82] Simons, D. L.; Boye, S. L.; Hauswirth, W. W.; Wu, S. M. Gene Therapy Prevents  
22 Photoreceptor Death and Preserves Retinal Function in a Bardet-Biedl Syndrome Mouse  
23 Model. *Proc. Natl. Acad. Sci. U. S. A.* **2011**, *108* (15), 6276–6281.

- 1 [83] Seo, S.; Mullins, R. F.; Dumitrescu, A. V; Bhattarai, S.; Gratie, D.; Wang, K.; Stone, E.  
2 M.; Sheffield, V.; Drack, A. V. Subretinal Gene Therapy of Mice with Bardet-Biedl  
3 Syndrome Type 1. *Invest. Ophthalmol. Vis. Sci.* **2013**, *54* (9), 6118–6132.
- 4 [84] Limberis, M. P.; Wilson, J. M. Adeno-Associated Virus Serotype 9 Vectors Transduce  
5 Murine Alveolar and Nasal Epithelia and Can Be Readministered. *Proc Natl Acad Sci U*  
6 *S A* **2006**, *103* (35), 12993–12998.
- 7 [85] Limberis, M. P.; Vandenberghe, L. H.; Zhang, L.; Pickles, R. J.; Wilson, J. M.  
8 Transduction Efficiencies of Novel AAV Vectors in Mouse Airway Epithelium in Vivo and  
9 Human Ciliated Airway Epithelium in Vitro. *Mol. Ther.* **2009**, *17* (2), 294–301.
- 10 [86] Cao, L.; Schrank, B. R.; Rodriguez, S.; Benz, E. G.; Moulia, T. W.; Rickenbacher, G. T.;  
11 Gomez, A. C.; Levites, Y.; Edwards, S. R.; Golde, T. E.; Hyman, B. T.; Barnea, G.;  
12 Albers, M. W. A $\beta$  Alters the Connectivity of Olfactory Neurons in the Absence of Amyloid  
13 Plaques in Vivo. *Nat. Commun.* **2012**, *3*, 1009.
- 14 [87] Burnight, E. R.; Wiley, L. A.; Drack, A. V; Braun, T. A.; Anfinson, K. R.; Kaalberg, E. E.;  
15 Halder, J. A.; Affatigato, L. M.; Mullins, R. F.; Stone, E. M.; Tucker, B. A. CEP290 Gene  
16 Transfer Rescues Leber Congenital Amaurosis Cellular Phenotype. *Gene Ther.* **2014**, *21*  
17 (7), 662–672.
- 18 [88] Ostrowski, L. E.; Yin, W.; Patel, M.; Sechelski, J.; Rogers, T.; Burns, K.; Grubb, B. R.;  
19 Olsen, J. C. Restoring Ciliary Function to Differentiated Primary Ciliary Dyskinesia Cells  
20 with a Lentiviral Vector. *Gene Ther* **2014**, *21* (3), 253–261.
- 21 [89] Chhin, B.; Negre, D.; Merrot, O.; Pham, J.; Tourneur, Y.; Ressnikoff, D.; Jaspers, M.;  
22 Jorissen, M.; Cosset, F. L.; Bouvagnet, P. Ciliary Beating Recovery in Deficient Human  
23 Airway Epithelial Cells after Lentivirus Ex Vivo Gene Therapy. *PLoS Genet.* **2009**, *5* (3).

- 1 [90] Sinn, P. L.; Burnight, E. R.; Hickey, M. A.; Blissard, G. W.; McCray, P. B. Persistent  
2 Gene Expression in Mouse Nasal Epithelia Following Feline Immunodeficiency Virus-  
3 Based Vector Gene Transfer. *J. Virol.* **2005**, *79* (20), 12818–12827.
- 4 [91] Chen, H.; Dadsetan, S.; Fomina, A. F.; Gong, Q. Expressing Exogenous Functional  
5 Odorant Receptors in Cultured Olfactory Sensory Neurons. *Neural Dev.* **2008**, *3* (1), 22.
- 6 [92] Sadrian, B.; Chen, H.; Gong, Q. Lentivirus-Mediated Genetic Manipulation and  
7 Visualization of Olfactory Sensory Neurons *in Vivo*. *J. Vis. Exp.* **2011**, No.  
8 51, 5–8.
- 9 [93] Sinn, P. L.; Arias, A. C.; Brogden, K. a; McCray, P. B. Lentivirus Vector Can Be  
10 Readministered to Nasal Epithelia without Blocking Immune Responses. *J. Virol.* **2008**,  
11 *82* (21), 10684–10692.
- 12 [94] Ranzani, M.; Cesana, D.; Bartholomae, C. C.; Sanvito, F.; Pala, M.; Benedicenti, F.;  
13 Gallina, P.; Sergi, L. S.; Merella, S.; Bulfone, A.; Doglioni, C.; von Kalle, C.; Kim, Y. J.;  
14 Schmidt, M.; Tonon, G.; Naldini, L.; Montini, E. Lentiviral Vector–based Insertional  
15 Mutagenesis Identifies Genes Associated with Liver Cancer. *Nat. Methods* **2013**, *10* (2),  
16 155–161.
- 17 [95] Papayannakos, C.; Daniel, R. Understanding Lentiviral Vector Chromatin Targeting:  
18 Working to Reduce Insertional Mutagenic Potential for Gene Therapy. *Gene Ther.* **2013**,  
19 *20* (6), 581–588.
- 20 [96] Chakraborty, C.; Teoh, S. L.; Das, S. The Smart Programmable CRISPR Technology: A  
21 Next Generation Genome Editing Tool for Investigators. *Curr. Drug Targets* **2017**, *18*  
22 (14), 1653–1663.
- 23 [97] LaFontaine, J. S.; Fathe, K.; Smyth, H. D. C. Delivery and Therapeutic Applications of

- 1 Gene Editing Technologies ZFNs, TALENs, and CRISPR/Cas9. *Int. J. Pharm.* **2015**, 494  
2 (1), 180–194.
- 3 [98] Lee, C. M.; Flynn, R.; Hollywood, J. A.; Scallan, M. F.; Harrison, P. T. Correction of the  
4  $\Delta$ F508 Mutation in the Cystic Fibrosis Transmembrane Conductance Regulator Gene by  
5 Zinc-Finger Nuclease Homology-Directed Repair. *Biores. Open Access* **2012**, 1 (3), 99–  
6 108.
- 7 [99] Crane, A. M.; Kramer, P.; Bui, J. H.; Chung, W. J.; Li, X. S.; Gonzalez-Garay, M. L.;  
8 Hawkins, F.; Liao, W.; Mora, D.; Choi, S.; Wang, J.; Sun, H. C.; Paschon, D. E.;  
9 Guschin, D. Y.; Gregory, P. D.; Kotton, D. N.; Holmes, M. C.; Sorscher, E. J.; Davis, B.  
10 R. Targeted Correction and Restored Function of the CFTR Gene in Cystic Fibrosis  
11 Induced Pluripotent Stem Cells. *Stem Cell Reports* **2015**, 4 (4), 569–577.
- 12 [100] Lai, M.; Pifferi, M.; Bush, A.; Piras, M.; Michelucci, A.; Di Cicco, M.; Del Grosso, A.;  
13 Quaranta, P.; Cursi, C.; Tantillo, E.; Franceschi, S.; Mazzanti, M. C.; Simi, P.; Saggese,  
14 G.; Boner, A.; Pistello, M. Gene Editing of DNAH11 Restores Normal Cilia Motility in  
15 Primary Ciliary Dyskinesia. *J Med Genet* **2016**, 53 (4), 242–249.
- 16 [101] Ruan, G. X.; Barry, E.; Yu, D.; Lukason, M.; Cheng, S. H.; Scaria, A. CRISPR/Cas9-  
17 Mediated Genome Editing as a Therapeutic Approach for Leber Congenital Amaurosis  
18 10. *Mol. Ther.* **2017**, 25 (2), 331–341.
- 19 [102] Li, Y.; Zhang, J.; Chen, D.; Yang, P.; Jiang, F.; Wang, X.; Kang, L. CRISPR/Cas9 in  
20 Locusts: Successful Establishment of an Olfactory Deficiency Line by Targeting the  
21 Mutagenesis of an Odorant Receptor Co-Receptor (Orco). *Insect Biochem. Mol. Biol.*  
22 **2016**, 79, 27–35.
- 23 [103] Koutroumpa, F. A.; Monsempes, C.; François, M.-C.; de Cian, A.; Royer, C.; Concordet,

- 1 J.-P.; Jacquin-Joly, E. Heritable Genome Editing with CRISPR/Cas9 Induces Anosmia in  
2 a Crop Pest Moth. *Sci. Rep.* **2016**, *6* (1), 29620.
- 3 [104] Tribble, W.; Olivos-Cisneros, L.; McKenzie, S. K.; Saragosti, J.; Chang, N.-C.; Matthews,  
4 B. J.; Oxley, P. R.; Kronauer, D. J. C. Orco Mutagenesis Causes Loss of Antennal Lobe  
5 Glomeruli and Impaired Social Behavior in Ants. *Cell* **2017**, *170* (4), 727–735.e10.
- 6 [105] Yan, H.; Opachaloemphan, C.; Mancini, G.; Yang, H.; Gallitto, M.; Mlejnek, J.; Leibholz,  
7 A.; Haight, K.; Ghaninia, M.; Huo, L.; Perry, M.; Slone, J.; Zhou, X.; Traficante, M.;  
8 Penick, C. A.; Dolezal, K.; Gokhale, K.; Stevens, K.; Fetter-Pruneda, I.; Bonasio, R.;  
9 Zwiebel, L. J.; Berger, S. L.; Liebig, J.; Reinberg, D.; Desplan, C. An Engineered Orco  
10 Mutation Produces Aberrant Social Behavior and Defective Neural Development in Ants.  
11 *Cell* **2017**, *170* (4), 736–747.e9.
- 12 [106] Farbman, A. I. Olfactory Neurogenesis: Genetic or Environmental Controls? *Trends*  
13 *Neurosci.* **1990**, *13* (9), 362–365.
- 14 [107] Mackay-Sim, A.; Kittel, P. W. On the Life Span of Olfactory Receptor Neurons. *Eur. J.*  
15 *Neurosci.* **1991**, *3* (3), 209–215.
- 16 [108] Goldstein, B. J.; Fang, H.; Youngentob, S. L.; Schwob, J. E. Transplantation of  
17 Multipotent Progenitors from the Adult Olfactory Epithelium. *Neuroreport* **1998**, *9* (7),  
18 1611–1617.
- 19 [109] Chen, X.; Fang, H.; Schwob, J. E. Multipotency of Purified, Transplanted Globose Basal  
20 Cells in Olfactory Epithelium. *J. Comp. Neurol.* **2004**, *469* (4), 457–474.
- 21 [110] Schnittke, N.; Herrick, D. B.; Lin, B.; Peterson, J.; Coleman, J. H.; Packard, A. I.; Jang,  
22 W.; Schwob, J. E. Transcription Factor p63 Controls the Reserve Status but Not the  
23 Stemness of Horizontal Basal Cells in the Olfactory Epithelium. *Proc. Natl. Acad. Sci. U.*



- 1 S. A. **2015**, *112* (36), E5068-77.
- 2 [111] Hummel, T.; Rissom, K.; Reden, J.; Hähner, A.; Weidenbecher, M.; Hüttenbrink, K.-B.  
3 Effects of Olfactory Training in Patients with Olfactory Loss. *Laryngoscope* **2009**, *119*  
4 (3), 496–499.
- 5 [112] Jiang, R. S.; Twu, C. W.; Liang, K. L. The Effect of Olfactory Training on the Odor  
6 Threshold in Patients with Traumatic Anosmia. *Am. J. Rhinol. Allergy* **2017**, *31* (5), 317–  
7 322.
- 8 [113] Damm, M.; Pikart, L. K.; Reimann, H.; Burkert, S.; Göktas, Ö.; Haxel, B.; Frey, S.;  
9 Charalampakis, I.; Beule, A.; Renner, B.; Hummel, T.; Hüttenbrink, K. B. Olfactory  
10 Training Is Helpful in Postinfectious Olfactory Loss: A Randomized, Controlled,  
11 Multicenter Study. *Laryngoscope* **2014**, *124* (4), 826–831.
- 12 [114] Konstantinidis, I.; Tsakiropoulou, E.; Constantinidis, J. Long Term Effects of Olfactory  
13 Training in Patients with Post-Infectious Olfactory Loss. *Rhinology* **2016**, *54* (2), 170–  
14 175.
- 15 [115] Kollndorfer, K.; Kowalczyk, K.; Hoche, E.; Mueller, C. A.; Pollak, M.; Trattinig, S.; Schöpf,  
16 V. Recovery of Olfactory Function Induces Neuroplasticity Effects in Patients with Smell  
17 Loss. *Neural Plast.* **2014**, *2014*, 1–7.
- 18 [116] Hida, K.; Lai, S. K.; Suk, J. S.; Won, S. Y.; Boyle, M. P.; Hanes, J. Common Gene  
19 Therapy Viral Vectors Do Not Efficiently Penetrate Sputum from Cystic Fibrosis Patients.  
20 *PLoS One* **2011**, *6* (5).
- 21 [117] Kitson, C.; Angel, B.; Judd, D.; Rothery, S.; Severs, N. J.; Dewar, a; Huang, L.;  
22 Wadsworth, S. C.; Cheng, S. H.; Geddes, D. M.; Alton, E. W. The Extra- and Intracellular  
23 Barriers to Lipid and Adenovirus-Mediated Pulmonary Gene Transfer in Native Sheep

- 1 Airway Epithelium. *Gene Ther.* **1999**, 6 (4), 534–546.
- 2 [118] Knowles, M. R.; Hohneker, K. W.; Zhou, Z.; Olsen, J. C.; Noah, T. L.; Hu, P. C.; Leigh,  
3 M. W.; Engelhardt, J. F.; Edwards, L. J.; Jones, K. R. A Controlled Study of Adenoviral-  
4 Vector-Mediated Gene Transfer in the Nasal Epithelium of Patients with Cystic Fibrosis.  
5 *N. Engl. J. Med.* **1995**, 333 (13), 823–831.
- 6 [119] Novarino, G.; Akizu, N.; Gleeson, J. G. Modeling Human Disease in Humans: The  
7 Ciliopathies. *Cell.* 2011, pp 70–79.
- 8 [120] Katsanis, N. Triallelic Inheritance in Bardet-Biedl Syndrome, a Mendelian Recessive  
9 Disorder. *Science (80- )*. **2001**, 293 (5538), 2256–2259.
- 10 [121] Katsanis, N.; Eichers, E. R.; Ansley, S. J.; Lewis, R. A.; Kayserili, H.; Hoskins, B. E.;  
11 Scambler, P. J.; Beales, P. L.; Lupski, J. R. BBS4 Is a Minor Contributor to Bardet-Biedl  
12 Syndrome and May Also Participate in Triallelic Inheritance. *Am. J. Hum. Genet.* **2002**,  
13 71 (1), 22–29.
- 14 [122] Joseph, P. M.; O’Sullivan, B. P.; Lapey, A.; Dorkin, H.; Oren, J.; Balfour, R.; Perricone,  
15 M. A.; Rosenberg, M.; Wadsworth, S. C.; Smith, A. E.; St Georg, J. A.; Meeker, D. P.  
16 Aerosol and Lobar Administration of a Recombinant Adenovirus to Individuals with  
17 Cystic Fibrosis. I. Methods, Safety, and Clinical Implications. *Hum Gene Ther* **2001**, 12  
18 (11), 1369–1382.
- 19 [123] Mingozi, F.; High, K. A. Immune Responses to AAV Vectors: Overcoming Barriers to  
20 Successful Gene Therapy. *Blood.* 2013, pp 23–36.
- 21 [124] Braun, J. J.; Noblet, V.; Durand, M.; Scheidecker, S.; Zinetti-Bertschy, A.; Foucher, J.;  
22 Marion, V.; Muller, J.; Riehm, S.; Dollfus, H.; Kremer, S. Olfaction Evaluation and  
23 Correlation with Brain Atrophy in Bardet-Biedl Syndrome. *Clin. Genet.* **2014**, 86 (6), 521–

- 1           529.
- 2 [125] Iannaccone, A.; Mykytyn, K.; Persico, A. M.; Searby, C. C.; Baldi, A.; Jablonski, M. M.;  
3           Sheffield, V. C. Clinical Evidence of Decreased Olfaction in Bardet-Biedl Syndrome  
4           Caused by a Deletion in the BBS4 Gene. *Am. J. Med. Genet.* **2005**, *132 A* (4), 343–346.
- 5 [126] Coppieters, F.; Lefever, S.; Leroy, B. P.; De Baere, E. CEP290, a Gene with Many  
6           Faces: Mutation Overview and Presentation of CEP290base. *Hum. Mutat.* **2010**, *31* (10),  
7           1097–1108.
- 8 [127] Ahdab-Barmada, M.; Claassen, D. A Distinctive Triad of Malformations of the Central  
9           Nervous System in the Meckel-Gruber Syndrome. *J. Neuropathol. Exp. Neurol.* **1990**, *49*  
10           (6), 610–620.
- 11 [128] Pluznick, J. L.; Rodriguez-Gil, D. J.; Hull, M.; Mistry, K.; Gattone, V.; Johnson, C. A.;  
12           Weatherbee, S.; Greer, C. A.; Caplan, M. J. Renal Cystic Disease Proteins Play Critical  
13           Roles in the Organization of the Olfactory Epithelium. *PLoS One* **2011**, *6* (5).
- 14 [129] Chang, B.; Khanna, H.; Hawes, N.; Jimeno, D.; He, S.; Lillo, C.; Parapuram, S. K.;  
15           Cheng, H.; Scott, A.; Hurd, R. E.; Sayer, J. A.; Otto, E. A.; Attanasio, M.; O’Toole, J. F.;  
16           Jin, G.; Shou, C.; Hildebrandt, F.; Williams, D. S.; Heckenlively, J. R.; Swaroop, A. In-  
17           Frame Deletion in a Novel Centrosomal/ciliary Protein CEP290/NPHP6 Perturbs Its  
18           Interaction with RPGR and Results in Early-Onset Retinal Degeneration in the rd16  
19           Mouse. *Hum. Mol. Genet.* **2006**, *15* (11), 1847–1857.
- 20 [130] Caspary, T.; Larkins, C. E.; Anderson, K. V. The Graded Response to Sonic Hedgehog  
21           Depends on Cilia Architecture. *Dev. Cell* **2007**, *12* (5), 767–778.
- 22 [131] Sun, Z. A Genetic Screen in Zebrafish Identifies Cilia Genes as a Principal Cause of  
23           Cystic Kidney. *Development* **2004**, *131* (16), 4085–4093.

- 1 [132] Gibberd, F. B.; Feher, M. D.; Sidey, M. C.; Wierzbicki, a S. Smell Testing: An Additional  
2 Tool for Identification of Adult Refsum's Disease. *J. Neurol. Neurosurg. Psychiatry* **2004**,  
3 75 (March 2005), 1334–1336.
- 4 [133] Wierzbicki, A. S.; Lloyd, M. D.; Schofield, C. J.; Feher, M. D.; Gibberd, F. B. Refsum's  
5 Disease: A Peroxisomal Disorder Affecting Phytanic Acid  $\alpha$ -Oxidation. *Journal of*  
6 *Neurochemistry*. 2002, pp 727–735.
- 7 [134] Abdel-Hak, B.; Gunkel, A.; Kanonier, G.; Schrott-Fischer, A.; Ulmer, H.; Thumfart, W.  
8 Ciliary Beat Frequency, Olfaction and Endoscopic Sinus Surgery. *ORL. J.*  
9 *Otorhinolaryngol. Relat. Spec.* **1998**, 60 (4), 202–205.
- 10 [135] Papon, J. F.; Perrault, I.; Coste, a; Louis, B.; Gérard, X.; Hanein, S.; Fares-Taie, L.;  
11 Gerber, S.; Defoort-Dhellemmes, S.; Vojtek, a M.; Kaplan, J.; Rozet, J. M.; Escudier, E.  
12 Abnormal Respiratory Cilia in Non-Syndromic Leber Congenital Amaurosis with CEP290  
13 Mutations. *J. Med. Genet.* **2010**, 47 (12), 829–834.
- 14 [136] Lehman, A. M.; Eydoux, P.; Doherty, D.; Glass, I. A.; Chitayat, D.; Chung, B. Y. H.;  
15 Langlois, S.; Yong, S. L.; Lowry, R. B.; Hildebrandt, F.; Trnka, P. Co-Occurrence of  
16 Joubert Syndrome and Jeune Asphyxiating Thoracic Dystrophy. *Am. J. Med. Genet. Part*  
17 *A* **2010**, 152 (6), 1411–1419.
- 18 [137] Maione, L.; Cantone, E.; Nettore, I. C.; Cerbone, G.; De Brasi, D.; Maione, N.; Young, J.;  
19 Di Somma, C.; Sinisi, A. A.; Iengo, M.; Macchia, P. E.; Pivonello, R.; Colao, A. Flavor  
20 Perception Test: Evaluation in Patients with Kallmann Syndrome. *Endocrine* **2016**, 52  
21 (2), 236–243.
- 22 [138] Koenigkam-Santos, M.; Santos, A. C.; Versiani, B. R.; Diniz, P. R. B.; Junior, J. E.; De  
23 Castro, M. Quantitative Magnetic Resonance Imaging Evaluation of the Olfactory

- 1 System in Kallmann Syndrome: Correlation with a Clinical Smell Test.  
2 *Neuroendocrinology* **2011**, 94 (3), 209–217.
- 3 [139] Dodé, C.; Rondard, P. PROK2/PROKR2 Signaling and Kallmann Syndrome. *Frontiers in*  
4 *Endocrinology*. 2013.
- 5 [140] Mitchell, A. L.; Dwyer, A.; Pitteloud, N.; Quinton, R. Genetic Basis and Variable  
6 Phenotypic Expression of Kallmann Syndrome: Towards a Unifying Theory. *Trends*  
7 *Endocrinol. Metab.* **2011**, 22 (7), 249–258.
- 8 [141] Bojesen, A.; Juul, S.; Gravholt, C. H. Prenatal and Postnatal Prevalence of Klinefelter  
9 Syndrome: A National Registry Study. *J. Clin. Endocrinol. Metab.* **2003**, 88 (2), 622–626.
- 10 [142] Lewkowitz-Shpuntoff, H. M.; Hughes, V. A.; Plummer, L.; Au, M. G.; Doty, R. L.;  
11 Seminara, S. B.; Chan, Y. M.; Pitteloud, N.; Crowley, W. F.; Balasubramanian, R.  
12 Olfactory Phenotypic Spectrum in Idiopathic Hypogonadotropic Hypogonadism:  
13 Pathophysiological and Genetic Implications. *J. Clin. Endocrinol. Metab.* **2012**, 97 (1).
- 14 [143] Vuorela, P. E.; Penttinen, M. T.; Hietala, M. H.; Laine, J. O.; Huoponen, K. A.;  
15 Kaariainen, H. A. A Familial CHARGE Syndrome with a CHD7 Nonsense Mutation and  
16 New Clinical Features. *Clin Dysmorphol* **2008**, 17 (4), 249–253.
- 17 [144] Jongmans, M. C. J.; van Ravenswaaij-Arts, C. M. A.; Pitteloud, N.; Ogata, T.; Sato, N.;  
18 Claahsen-van der Grinten, H. L.; van der Donk, K.; Seminara, S.; Bergman, J. E. H.;  
19 Brunner, H. G.; Crowley, W. F.; Hoefsloot, L. H. CHD7 Mutations in Patients Initially  
20 Diagnosed with Kallmann Syndrome - The Clinical Overlap with CHARGE Syndrome.  
21 *Clin. Genet.* **2009**, 75 (1), 65–71.
- 22 [145] Jansen, F.; Kalbe, B.; Scholz, P.; Mikosz, M.; Wunderlich, K. A.; Kurtenbach, S.; Nagel-  
23 Wolfrum, K.; Wolfrum, U.; Hatt, H.; Osterloh, S. Impact of the Usher Syndrome on

- 1 Olfaction. *Hum. Mol. Genet.* **2016**, 25 (3), 524–533.
- 2 [146] Seeliger, M.; Pfister, M.; Gendo, K.; Paasch, S.; Apfelstedt-Sylla, E.; Plinkert, P.; Zenner,  
3 H.-P.; Zrenner, E. Comparative Study of Visual, Auditory, and Olfactory Function in  
4 Usher Syndrome. *Graefe's Arch. Clin. Exp. Ophthalmol.* **1999**, 237 (4), 301–307.
- 5 [147] Ribeiro, J. C.; Oliveiros, B.; Pereira, P.; António, N.; Hummel, T.; Paiva, A.; Silva, E. D.  
6 Accelerated Age-Related Olfactory Decline among Type 1 Usher Patients. *Sci. Rep.*  
7 **2016**, 6 (1), 28309.
- 8 [148] Marietta, J.; Walters, K. S.; Burgess, R.; Moore, K. C.; Ni, L.; Hejtmancik, J. F.;  
9 Fukushima, K.; Smith, R. J. H. Usher's Syndrome Type IC: Clinical Studies and Fine-  
10 Mapping the Disease Locus. *Ann. Otol. Rhinol. Laryngol.* **1997**, 106 (2), 123–128.
- 11 [149] Reiners, J.; Nagel-Wolfrum, K.; Jürgens, K.; Märker, T.; Wolfrum, U. Molecular Basis of  
12 Human Usher Syndrome: Deciphering the Meshes of the Usher Protein Network  
13 Provides Insights into the Pathomechanisms of the Usher Disease. *Exp. Eye Res.* **2006**,  
14 83 (1), 97–119.
- 15 [150] Endoh-Yamagami, S.; Karkar, K. M.; May, S. R.; Cobos, I.; Thwin, M. T.; Long, J. E.;  
16 Ashique, A. M.; Zarbali, K.; Rubenstein, J. L. R.; Peterson, A. S. A Mutation in the  
17 Pericentrin Gene Causes Abnormal Interneuron Migration to the Olfactory Bulb in Mice.  
18 *Dev. Biol.* **2010**, 340 (1), 41–53.
- 19 [151] Hori, A.; Tamagawa, K.; Eber, S. W.; Westmeier, M.; Hansmann, I. Neuropathology of  
20 Seckel Syndrome in Fetal Stage with Evidence of Intrauterine Developmental  
21 Retardation. *Acta Neuropathol.* **1987**, 74 (4), 397–401.
- 22 [152] Brasseur, B.; Martin, C. M.; Cayci, Z.; Burmeister, L.; Schimmenti, L. A. Bosma Arhinia  
23 Microphthalmia Syndrome: Clinical Report and Review of the Literature. *Am. J. Med.*

- 1           *Genet. Part A* **2016**, 170 (5).
- 2 [153] Graham, J. M.; Lee, J. Bosma Arhinia Microphthalmia Syndrome. *Am. J. Med. Genet.*  
3           **2006**, 140 A (2), 189–193.
- 4 [154] Lahiry, P.; Wang, J.; Robinson, J. F.; Turowec, J. P.; Litchfield, D. W.; Lanktree, M. B.;  
5           Gloor, G. B.; Puffenberger, E. G.; Strauss, K. A.; Martens, M. B.; Ramsay, D. A.; Rupar,  
6           C. A.; Siu, V.; Hegele, R. A. A Multiplex Human Syndrome Implicates a Key Role for  
7           Intestinal Cell Kinase in Development of Central Nervous, Skeletal, and Endocrine  
8           Systems. *Am. J. Hum. Genet.* **2008**, 84 (2), 134–147.
- 9 [155] Moerman, P.; Fryns, J. P. Oral-Facial-Digital Syndrome Type IV (Mohr-Majewski  
10           Syndrome): A Fetopathological Study. *Genet. Couns.* **1998**, 9 (1), 39–43.
- 11 [156] Thomas, S.; Legendre, M.; Saunier, S.; Bessières, B.; Alby, C.; Bonnière, M.; Toutain,  
12           A.; Loeuillet, L.; Szymanska, K.; Jossic, F.; Gaillard, D.; Yacoubi, M. T.; Mougou-Zerelli,  
13           S.; David, A.; Barthez, M. A.; Ville, Y.; Bole-Feysot, C.; Nitschke, P.; Lyonnet, S.;  
14           Munnich, A.; Johnson, C. A.; Encha-Razavi, F.; Cormier-Daire, V.; Thauvin-Robinet, C.;  
15           Vekemans, M.; Attié-Bitach, T. TCTN3 Mutations Cause Mohr-Majewski Syndrome. *Am.*  
16           *J. Hum. Genet.* **2012**, 91 (2), 372–378.
- 17 [157] Spranger, J.; Grimm, B.; Weller, M.; Weißenbacher, G.; Herrmann, J.; Gilbert, E.;  
18           Krepler, R. Short Rib-Polydactyly (SRP) Syndromes, Types Majewski and Saldino-  
19           Noonan. *Z. Kinderheilkd.* **1974**, 116 (2), 73–94.
- 20 [158] Sailani, M. R.; Jingga, I.; MirMazlomi, S. H.; Bitarafan, F.; Bernstein, J. A.; Snyder, M. P.;  
21           Garshasbi, M. Isolated Congenital Anosmia and CNGA2 Mutation. *Sci. Rep.* **2017**, 7 (1),  
22           2667.
- 23 [159] Karstensen, H. G.; Mang, Y.; Fark, T.; Hummel, T.; Tommerup, N. The First Mutation in

1 CNGA2 in Two Brothers with Anosmia. *Clin. Genet.* **2015**, *88* (3), 293–296.

2 [160] Alkelai, A.; Olender, T.; Haffner-Krausz, R.; Tsoory, M. M.; Boyko, V.; Tatarsky, P.;  
3 Gross-Isseroff, R.; Milgrom, R.; Shushan, S.; Blau, I.; Cohn, E.; Beer, R.; Levy-Lahad,  
4 E.; Pras, E.; Lancet, D. A Role for TENM1 Mutations in Congenital General Anosmia.  
5 *Clin. Genet.* **2016**, *90* (3), 211–219.

6 [161] Weiss, J.; Pyrski, M.; Jacobi, E.; Bufe, B.; Willnecker, V.; Schick, B.; Zizzari, P.;  
7 Gossage, S. J.; Greer, C. A.; Leinders-Zufall, T.; Woods, C. G.; Wood, J. N.; Zufall, F.  
8 Loss-of-Function Mutations in Sodium Channel Nav1.7 Cause Anosmia. *Nature* **2011**,  
9 *472* (7342), 186–190.

10  
11  
12  
13  
14  
15  
16  
17  
18  
19  
20  
21  
22  
23
